# Supplementary material
Source: MDPI journal article supplement (https://www.mdpi.com/2077-0472/11/7/584)
Supplement: s1 [file s1]

Supplementary data:

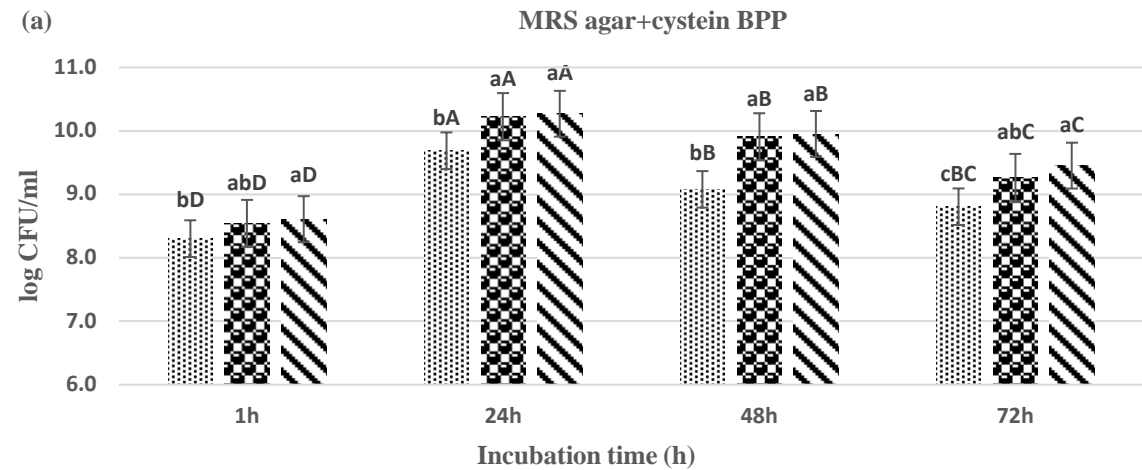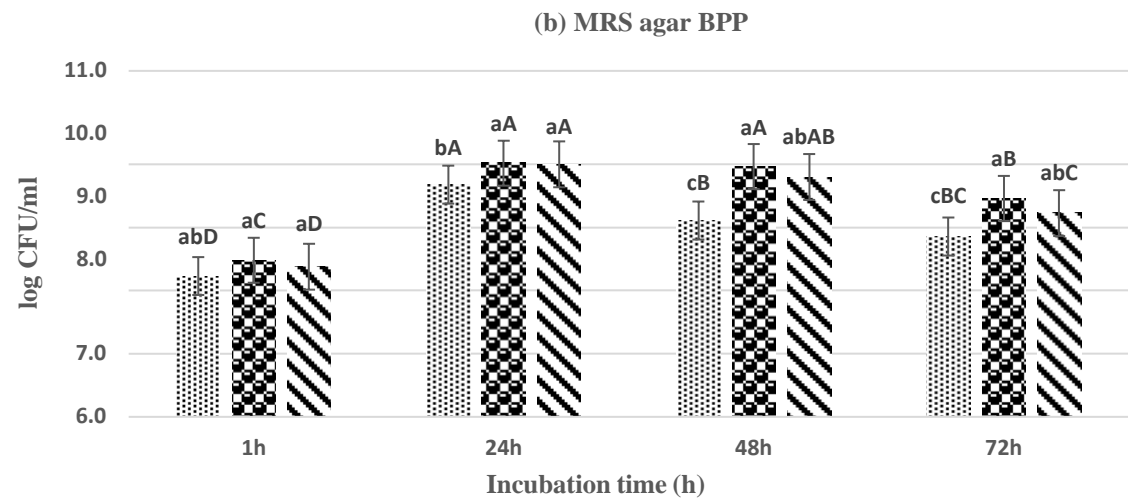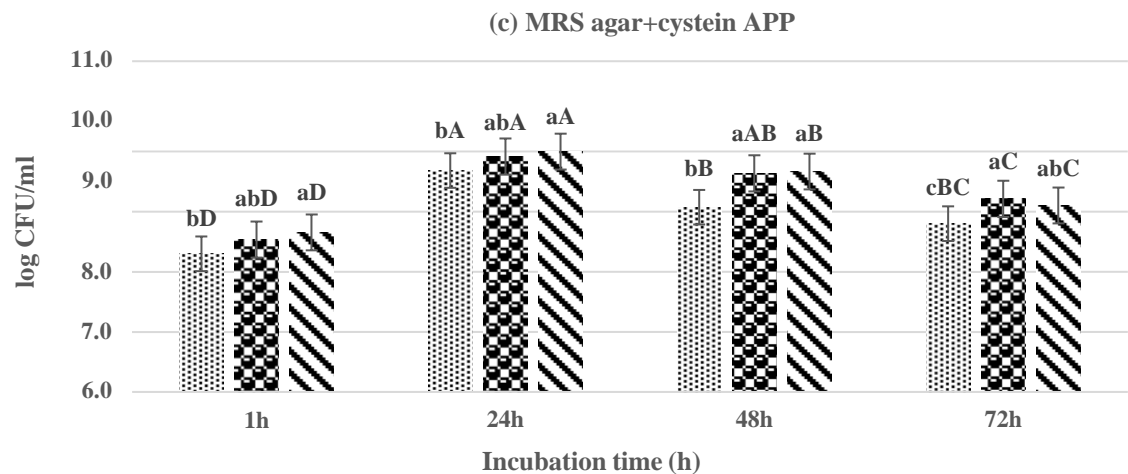

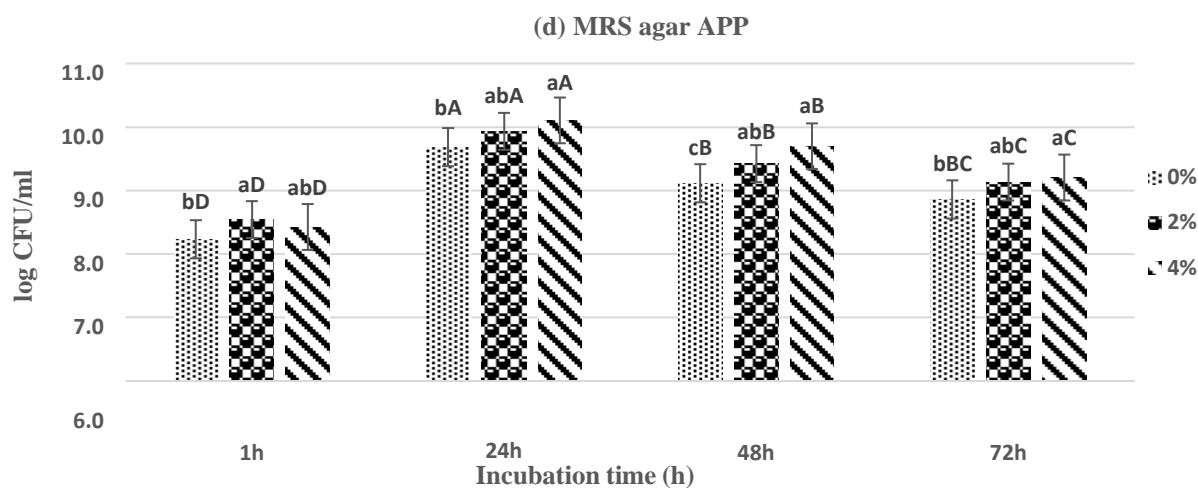

**Figure S1.** Multi-strain probiotic counts on MRS agar and MRS agar +cysteine during 72h of anaerobic incubation on banana (a & b) and apple (c & d) peel supplemented culture media. Different lowercase letters indicate significant difference ( $p < 0.05$ ) based on the concentration of FPP (0%, 2%, 4%) within same incubation time points and similar probiotic strain. Various uppercase letters indicate significant differences at same concentrations at different incubation time points. Data represents mean values  $\pm$  standard error. (n= 4).
